# Supplementary material for: Sawtooth chains self-assembled from clusters of MnO6 octahedra within the silicate framework of K3Mn4Si10O24.33(H2O,OH)3/V,B
Source: Royal Society of Chemistry journal article supplement (doi:10.1039/d2ce00922f), 2022-01-01
Supplement: d2ce00922f1.pdf [file d2ce00922f1.pdf]

## SUPPORTING INFORMATION

**Sawtooth chains self-assembled by clusters of MnO<sub>6</sub> octahedra within the silicate framework of**

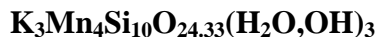

*Olga V. Yakubovich,<sup>\*a</sup> Larisa V. Shvanskaya,<sup>a,c</sup> Galina V. Kiriukhina,<sup>a,b</sup> Olga V. Dimitrova,<sup>a</sup> Anatoly S. Volkov,<sup>a</sup> Olga S. Volkova<sup>a,c</sup> and Alexander N. Vasiliev<sup>a,c</sup>*

<sup>a</sup>Lomonosov Moscow State University, Moscow, 119991, Russia

<sup>b</sup>Institute of Experimental Mineralogy RAS, Chernogolovka, Moscow region, 142432, Russia

<sup>c</sup>National University of Science and Technology "MISiS", Moscow 119049, Russia

### Table of contents

|                                      |   |
|--------------------------------------|---|
| 1. Geometric parameters.....         | 2 |
| 1. Powder diffraction data.....      | 4 |
| 2. Bond valence data.....            | 5 |
| 3. Magnetic data interpretation..... | 6 |
| 4. References.....                   | 6 |

1. Geometric parameters

**Table S1.** Selected geometric parameters (Å)

|                       |            |                        |            |
|-----------------------|------------|------------------------|------------|
| Mn2—O3 <sup>i</sup>   | 2.138 (6)  | K1—O1 <sup>iv</sup>    | 2.881 (7)  |
| Mn2—O11               | 2.141 (6)  | K1—O1 <sup>ix</sup>    | 2.881 (7)  |
| Mn2—O2                | 2.184 (6)  | K1—O11                 | 3.183 (8)  |
| Mn2—O4 <sup>ii</sup>  | 2.190 (6)  | K1—O11 <sup>vii</sup>  | 3.183 (8)  |
| Mn2—O2 <sup>iii</sup> | 2.241 (7)  | K1'—O5                 | 2.71 (3)   |
| Mn2—O4 <sup>i</sup>   | 2.244 (7)  | K1'—O1 <sup>ix</sup>   | 2.90 (2)   |
| Mn1—O12 <sup>iv</sup> | 2.079 (9)  | K1'—O1 <sup>iv</sup>   | 2.90 (2)   |
| Mn1—O11               | 2.092 (7)  | K1'—O11                | 3.14 (2)   |
| Mn1—O3 <sup>iv</sup>  | 2.111 (7)  | K1'—O11 <sup>vii</sup> | 3.14 (2)   |
| Mn1—O9                | 2.255 (10) | K1'—O12 <sup>ix</sup>  | 3.16 (2)   |
| Mn1—O2                | 2.390 (6)  | K1'—O12 <sup>iv</sup>  | 3.16 (2)   |
| Mn1—O4 <sup>i</sup>   | 2.449 (6)  | K1'—O8 <sup>i</sup>    | 3.17 (3)   |
| V1—O9                 | 1.61 (2)   | K1'—O6 <sup>x</sup>    | 3.29 (2)   |
| V1—O12 <sup>iv</sup>  | 1.817 (19) | K1'—O6 <sup>i</sup>    | 3.29 (2)   |
| V1—O11                | 2.325 (18) | K2—O8 <sup>iv</sup>    | 2.902 (11) |
| V1—O3 <sup>iv</sup>   | 2.475 (19) | K2—O9 <sup>xi</sup>    | 2.903 (9)  |
| Si1—O11               | 1.574 (7)  | K2—O9                  | 2.903 (9)  |
| Si1—O10               | 1.616 (8)  | K2—O6                  | 2.983 (8)  |
| Si1—O1                | 1.630 (7)  | K2—O6 <sup>xi</sup>    | 2.983 (8)  |
| Si1—O5                | 1.633 (4)  | K2—O3 <sup>iv</sup>    | 3.007 (7)  |
| Si2—O2                | 1.601 (7)  | K2—O3 <sup>xii</sup>   | 3.007 (7)  |
| Si2—O4                | 1.607 (7)  | K2—O5 <sup>ii</sup>    | 3.062 (10) |
| Si2—O6                | 1.642 (6)  | K2—O1 <sup>xiii</sup>  | 3.125 (7)  |
| Si2—O1 <sup>ii</sup>  | 1.648 (6)  | K2—O1 <sup>ii</sup>    | 3.125 (7)  |
| Si3—O3                | 1.596 (7)  | K2'—O9 <sup>xi</sup>   | 2.61 (2)   |
| Si3—O8                | 1.617 (3)  | K2'—O9                 | 2.61 (2)   |
| Si3—O6                | 1.626 (7)  | K2'—O6                 | 2.85 (3)   |
| Si3—O7                | 1.629 (7)  | K2'—O6 <sup>xi</sup>   | 2.85 (3)   |
| Si4—O12               | 1.593 (10) | K2'—O8 <sup>iv</sup>   | 3.09 (4)   |
| Si4—O10               | 1.593 (9)  | K2'—O3 <sup>iv</sup>   | 3.15 (2)   |
| Si4—O13               | 1.603 (8)  | K2'—O3 <sup>xii</sup>  | 3.15 (2)   |

|                         |            |                        |            |
|-------------------------|------------|------------------------|------------|
| Si4—O7                  | 1.652 (7)  | K2'—O1 <sup>xiii</sup> | 3.33 (3)   |
| V2—O7                   | 1.42 (2)   | K2'—O1 <sup>ii</sup>   | 3.33 (3)   |
| V2—O9                   | 1.87 (2)   | K3—O16                 | 2.84 (3)   |
| V2—O10                  | 1.99 (2)   | K3—O12 <sup>iv</sup>   | 2.958 (13) |
| V2—O13                  | 2.26 (2)   | K3—O12 <sup>ix</sup>   | 2.958 (13) |
| Mn3—O14                 | 1.85 (4)   | K3—O15 <sup>v</sup>    | 3.05 (2)   |
| Mn3—O16 <sup>v</sup>    | 1.87 (2)   | K3—O10 <sup>vii</sup>  | 3.371 (14) |
| Mn3—O16                 | 1.87 (2)   | K3—O10                 | 3.371 (14) |
| Mn3—O16 <sup>vi</sup>   | 1.87 (2)   | K3'—O16                | 2.63 (5)   |
| Si6—O14                 | 1.27 (4)   | K3'—O12 <sup>ix</sup>  | 2.78 (4)   |
| Si6—O15 <sup>v</sup>    | 1.590 (13) | K3'—V3 <sup>vii</sup>  | 2.88 (5)   |
| Si6—O15 <sup>vi</sup>   | 1.590 (13) | K3'—O9 <sup>vii</sup>  | 2.99 (3)   |
| Si6—O15                 | 1.590 (12) | K3'—O17 <sup>v</sup>   | 2.99 (4)   |
| Si7—O13                 | 1.570 (8)  | K3'—O15 <sup>v</sup>   | 3.03 (4)   |
| Si7—O13 <sup>vii</sup>  | 1.570 (8)  | K3'—O10 <sup>vii</sup> | 3.16 (4)   |
| Si7—O15 <sup>viii</sup> | 1.60 (2)   | Mn4—O16                | 2.188 (17) |
| Si7—O16                 | 1.66 (3)   | Mn4—O16 <sup>v</sup>   | 2.188 (17) |
| K1—O5                   | 2.802 (12) | V3—O17 <sup>v</sup>    | 1.82 (4)   |
| K1—O12 <sup>ix</sup>    | 2.806 (9)  | V3—O9 <sup>vii</sup>   | 2.42 (3)   |
| K1—O12 <sup>iv</sup>    | 2.806 (9)  |                        |            |

Symmetry code(s): (i)  $-x+y+1/3, -x+5/3, z+2/3$ ; (ii)  $-y+5/3, x-y+4/3, z+1/3$ ; (iii)  $-x+y+1/3, -x+5/3, z-1/3$ ; (iv)  $x, y, z+1$ ; (v)  $-y+1, x-y+1, z$ ; (vi)  $-x+y, -x+1, z$ ; (vii)  $-x+y, y, z$ ; (viii)  $-y+1, x-y+1, z-1$ ; (ix)  $-x+y, y, z+1$ ; (x)  $-y+4/3, -x+5/3, z+2/3$ ; (xi)  $x, x-y+1, z$ ; (xii)  $x, x-y+1, z+1$ ; (xiii)  $-y+5/3, -x+4/3, z+1/3$ .

## 2. Powder diffraction data

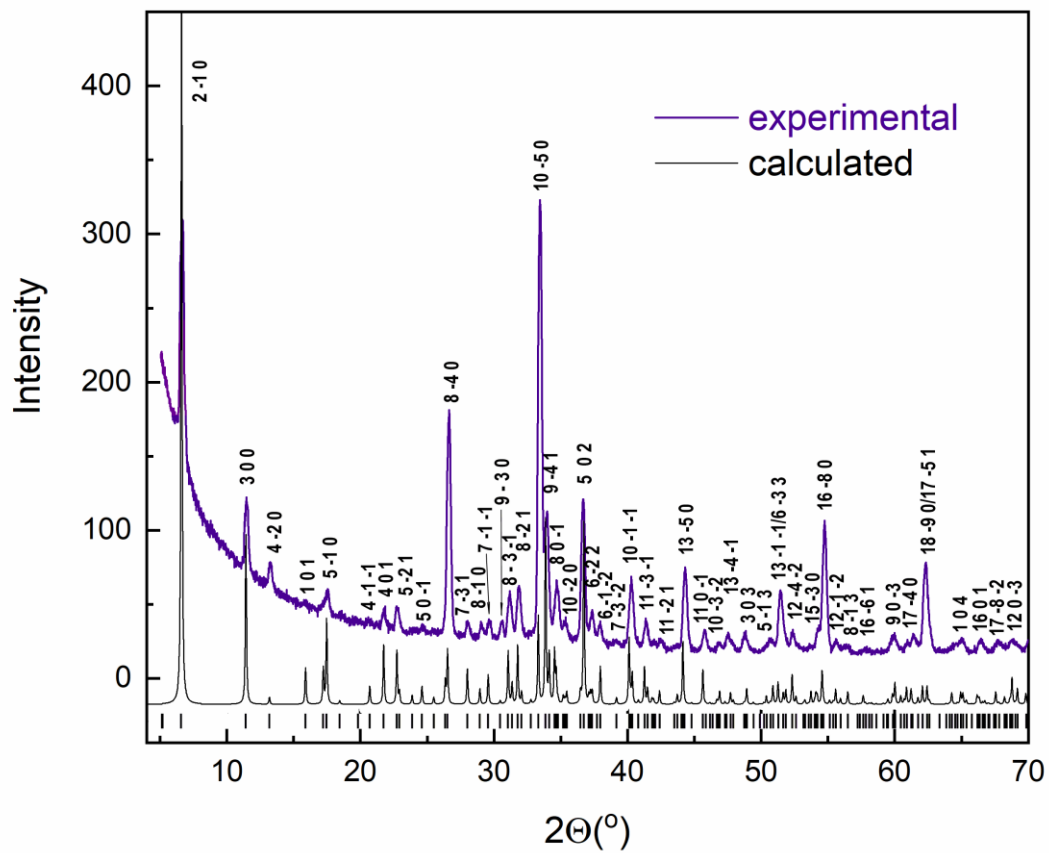

**Figure S1.** Experimental and calculated powder XRD patterns of  $K_3Mn_4Si_{10}O_{24.33}(H_2O,OH)_3$  (the vertical ticks indicate the Bragg positions).

### 3. Bond valence data

**Table S2.** Bond valence data for  $K_3Mn_4[Si_{10}O_{24.33}](H_2O,OH)_{2.81}/V,B^*$

| Atom | Mn1   | Mn2         | Si1                 | Si2   | Si3                 | Si4   | Si5/Mn3             | Si6/B1              | Si7/B2              | K1                  | K2                  | K3                 | K3'                | Σ    |
|------|-------|-------------|---------------------|-------|---------------------|-------|---------------------|---------------------|---------------------|---------------------|---------------------|--------------------|--------------------|------|
| O1   |       |             | 0.989               | 0.937 |                     |       |                     |                     |                     | 0.130 <sub>↓2</sub> | 0.068 <sub>↓2</sub> |                    |                    | 2.12 |
| O2   | 0.199 | 0.346;0.290 |                     | 1.073 |                     |       |                     |                     |                     |                     |                     |                    |                    | 1.91 |
| O3   | 0.417 | 0.395       |                     |       | 1.079               |       |                     |                     |                     |                     | 0.093 <sub>↓2</sub> |                    |                    | 1.98 |
| O4   | 0.168 | 0.340;0.297 |                     | 1.039 |                     |       |                     |                     |                     |                     |                     |                    |                    | 1.89 |
| O5   |       |             | 0.979 <sub>→2</sub> |       |                     |       |                     |                     |                     | 0.165               | 0.079               |                    |                    | 2.20 |
| O6   |       |             |                     | 0.945 | 0.997               |       |                     |                     |                     |                     | 0.102 <sub>↓2</sub> |                    |                    | 2.04 |
| O7   |       |             |                     |       | 0.987               | 0.937 |                     |                     |                     |                     |                     |                    |                    | 1.92 |
| O8   |       |             |                     |       | 1.016 <sub>→2</sub> |       |                     |                     |                     |                     | 0.125               |                    |                    | 2.16 |
| O9   | 0.285 |             |                     |       |                     |       |                     |                     |                     |                     | 0.123 <sub>↓2</sub> |                    | 0.07               | 0.48 |
| O10  |       |             | 1.025               |       |                     | 1.079 |                     |                     |                     |                     |                     | 0.02 <sub>↓2</sub> |                    | 2.12 |
| O11  | 0.443 | 0.382       | 1.154               |       |                     |       |                     |                     |                     | 0.059 <sub>↓2</sub> |                     |                    |                    | 2.04 |
| O12  | 0.460 |             |                     |       |                     | 1.064 |                     |                     |                     | 0.165 <sub>↓2</sub> |                     | 0.04 <sub>↓2</sub> | 0.04               | 1.77 |
| O13  |       |             |                     |       |                     | 1.053 |                     |                     | 1.089 <sub>↓2</sub> |                     |                     |                    | 0.02               | 2.16 |
| O14  |       |             |                     |       |                     |       | 1.134               | 0.971               |                     |                     |                     |                    |                    | 2.10 |
| O15  |       |             |                     |       |                     |       |                     | 0.937 <sub>↓3</sub> | 0.987               |                     |                     | 0.03               | 0.02 <sub>→2</sub> | 1.99 |
| O16  |       |             |                     |       |                     |       | 0.626 <sub>↓3</sub> |                     | 1.031               |                     |                     | 0.06               | 0.01 <sub>→2</sub> | 1.74 |
| O17  |       |             |                     |       |                     |       |                     |                     |                     |                     |                     |                    |                    | 0.00 |
| Σ    | 1.97  | 2.05        | 4.15                | 3.99  | 4.08                | 4.13  | 3.01                | 3.78                | 4.20                | 0.87                | 0.98                | 0.21               | 0.16               |      |

\* The calculation is made without considering K and V sites with the low occupancy. Symbols → and ↓ denote an increase in the corresponding contributions in rows and columns due to symmetry.

#### 4. Magnetic data interpretation

The magnetic subsystem in the title compound represents a rare case of quasi-one dimensional arrangement of  $\text{MnO}_6$  octahedra forming sawtooth-like chain. In the absence of first principles calculations rough estimate of magnetic exchange interactions within saw – tooth chains can be done basing on  $J$  dependence versus distances and angles between  $\text{Mn}^{2+}$  ions Ref. 1. The  $\text{Mn1} - \text{Mn2}$  distances are equal to 3.03 and 3.05 Å which corresponds to antiferromagnetic exchange interactions  $J_{\text{AF1}} = 14.5$  K and  $J_{\text{AF2}} = 10.15$  K, while  $\text{Mn2} - \text{Mn2}$  distance equals to 3.28 Å corresponding to ferromagnetic exchange interaction  $J_{\text{F}} = -4.4$  K. The magnetic topology of saw – tooth chain is shown in the inset to Fig. S2. In the first approximation we may assume  $J_{\text{AF1}} = J_{\text{AF2}} = J$  and neglect much weaker  $J_{\text{F}}$  which makes studied saw – tooth chain close to the model of antiferromagnetic  $S = 5/2$  chain. The magnetic susceptibility of  $\text{K}_3\text{Mn}_4\text{Si}_{10}\text{O}_{24.33}(\text{H}_2\text{O}, \text{OH})_3/\text{V}, \text{B}$  can be fitted in the range 100 – 300 K by the sum of temperature independent term  $\chi_0$ , Curie – Weiss term  $\chi_{\text{para}}$  from paramagnetic  $\text{Mn}^{3+}$  ions weakly coupled to the saw-tooth chains and  $\chi_{\text{chain}}$  described by the formula:<sup>2</sup>

$$\chi_{\text{chain}} = \frac{N_A g^2 S(S+1) \mu_B^2}{3k_B T} \frac{1+u}{1-u}, u = \coth\left(\frac{2JS(S+1)}{k_B T}\right) - \frac{k_B T}{2JS(S+1)},$$

$$\chi_{\text{sum}} = \chi_0 + \chi_{\text{para}} + \alpha \chi_{\text{chain}}$$

Obtained from the fit values of parameters are  $\chi_0 = -3.9 \times 10^{-4}$  emu/mol,  $\alpha = 0.7$ ,  $J = 6.6$  K. The temperature independent term is close to that obtained from the fit with Curie – Weiss law. The coefficient  $\alpha$  is different from unity signaling the presence of some defects in the structure. Obtained value of  $J$  is close to  $J_{\text{AF1}}$  and  $J_{\text{AF2}}$ .

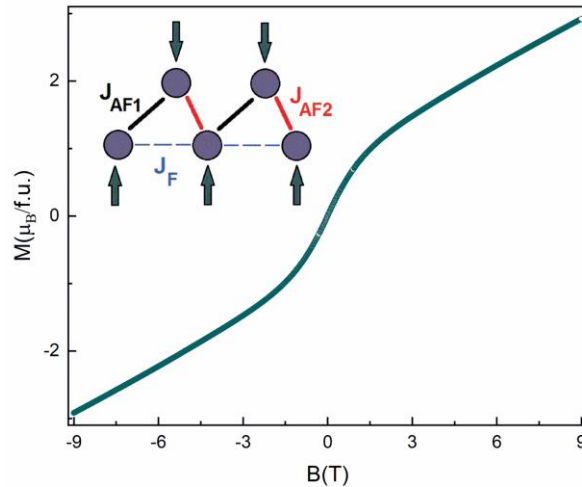

**Figure S2.** The field dependence of magnetization at  $T = 2$  K and topology of magnetic chains in the structure. The  $\text{Mn}^{2+}$  ( $S = 5/2$ ) ions are shown by spheres, antiferromagnetic and ferromagnetic exchange interactions are shown by lines.

#### 5. References

- 1 R. Li, R.I. Smith and S. Greaves, *Chem. Commun.*, 2021, **57**, 7027.
- 2 R. Dingle, M. E. Lines, S. L. Holt, *Phys. Rev.*, 1969, **187**, 643.
